# Supplementary material for: Mathematical Modelling of Cervical Precancerous Lesion Grade Risk Scores: Linear Regression Analysis of Cellular Protein Biomarkers and Human Papillomavirus E6/E7 RNA Staining Patterns
Source: MDPI journal article supplement (doi:10.3390/diagnostics13061084), 2023-03-13
Supplement: s1 [file s1]

**Supplement Table S1.** Experimental results of substituting values in the development of mathematical models.

| No. | Age | Age<br>group | Grade  | Ki-67 | Ki-67 | p16 <sup>AS</sup> | p16 <sup>P/N</sup> | CTTN | CTTN | mRNA |
|-----|-----|--------------|--------|-------|-------|-------------------|--------------------|------|------|------|
|     |     |              |        | AS    | P/N   |                   |                    | AS   | P/N  | E6E7 |
| 1   | 49  | 3            | normal | 0     | 1     | 0                 | 1                  | 2    | 1    | 1    |
| 2   | 43  | 3            | normal | 0     | 1     | 0                 | 1                  | 0    | 1    | 1    |
| 3   | 57  | 4            | normal | 0     | 1     | 0                 | 1                  | 3    | 1    | 1    |
| 4   | 27  | 1            | normal | 0     | 1     | 0                 | 1                  | 3    | 1    | 1    |
| 5   | 49  | 3            | normal | 0     | 1     | 0                 | 1                  | 3    | 1    | 2    |
| 6   | 42  | 3            | normal | 0     | 1     | 0                 | 1                  | 3    | 1    | 2    |
| 7   | 44  | 3            | normal | 0     | 1     | 0                 | 1                  | 4    | 2    | 1    |
| 8   | 54  | 4            | normal | 0     | 1     | 0                 | 1                  | 5    | 2    | 2    |
| 9   | 43  | 3            | normal | 0     | 1     | 0                 | 1                  | 7    | 2    | 2    |
| 10  | 54  | 4            | normal | 0     | 1     | 0                 | 1                  | 5    | 2    | 2    |
| 11  | 51  | 4            | normal | 3     | 1     | 0                 | 1                  | 0    | 1    | 2    |
| 12  | 36  | 2            | normal | 3     | 1     | 0                 | 1                  | 3    | 1    | 2    |
| 13  | 36  | 2            | normal | 4     | 2     | 0                 | 1                  | 3    | 1    | 2    |
| 14  | 43  | 3            | normal | 4     | 2     | 0                 | 1                  | 0    | 1    | 2    |
| 15  | 57  | 4            | normal | 5     | 2     | 0                 | 1                  | 3    | 1    | 2    |
| 16  | 51  | 4            | normal | 4     | 2     | 0                 | 1                  | 6    | 2    | 2    |
| 17  | 38  | 2            | normal | 4     | 2     | 0                 | 1                  | 6    | 2    | 2    |
| 18  | 42  | 3            | normal | 4     | 2     | 0                 | 1                  | 6    | 2    | 2    |
| 19  | 35  | 2            | normal | 4     | 2     | 0                 | 1                  | 4    | 2    | 2    |
| 20  | 46  | 3            | normal | 5     | 2     | 0                 | 1                  | 5    | 2    | 2    |
| 21  | 48  | 3            | LSIL   | 0     | 1     | 0                 | 1                  | 0    | 1    | 2    |
| 22  | 47  | 3            | LSIL   | 0     | 1     | 0                 | 1                  | 0    | 1    | 2    |
| 23  | 20  | 1            | LSIL   | 0     | 1     | 0                 | 1                  | 2    | 1    | 2    |
| 24  | 35  | 2            | LSIL   | 0     | 1     | 2                 | 1                  | 6    | 2    | 1    |
| 25  | 49  | 3            | LSIL   | 0     | 1     | 0                 | 1                  | 5    | 2    | 2    |
| 26  | 50  | 4            | LSIL   | 0     | 1     | 0                 | 1                  | 4    | 2    | 2    |
| 27  | 61  | 5            | LSIL   | 0     | 1     | 0                 | 1                  | 6    | 2    | 2    |
| 28  | 21  | 1            | LSIL   | 0     | 1     | 0                 | 1                  | 7    | 2    | 2    |
| 29  | 48  | 3            | LSIL   | 0     | 1     | 0                 | 1                  | 7    | 2    | 2    |

|    |    |   |      |   |   |   |   |   |   |   |
|----|----|---|------|---|---|---|---|---|---|---|
| 30 | 34 | 2 | LSIL | 0 | 1 | 0 | 1 | 4 | 2 | 2 |
| 31 | 36 | 2 | LSIL | 0 | 1 | 5 | 1 | 6 | 2 | 1 |
| 32 | 32 | 2 | LSIL | 0 | 1 | 2 | 1 | 6 | 2 | 2 |
| 33 | 54 | 4 | LSIL | 0 | 1 | 2 | 1 | 7 | 2 | 2 |
| 34 | 51 | 4 | LSIL | 0 | 1 | 2 | 1 | 6 | 2 | 2 |
| 35 | 34 | 2 | LSIL | 5 | 2 | 0 | 1 | 6 | 2 | 1 |
| 36 | 57 | 4 | LSIL | 0 | 1 | 5 | 1 | 6 | 2 | 2 |
| 37 | 84 | 5 | LSIL | 0 | 1 | 5 | 1 | 6 | 2 | 2 |
| 38 | 29 | 1 | LSIL | 4 | 2 | 0 | 1 | 4 | 2 | 2 |
| 39 | 23 | 1 | LSIL | 4 | 2 | 0 | 1 | 6 | 2 | 2 |
| 40 | 54 | 4 | LSIL | 5 | 2 | 0 | 1 | 6 | 2 | 2 |
| 41 | 24 | 1 | LSIL | 5 | 2 | 5 | 1 | 7 | 2 | 1 |
| 42 | 43 | 3 | LSIL | 4 | 2 | 4 | 1 | 4 | 2 | 2 |
| 43 | 39 | 2 | LSIL | 4 | 2 | 5 | 2 | 5 | 2 | 2 |
| 44 | 47 | 3 | LSIL | 5 | 2 | 5 | 1 | 6 | 2 | 2 |
| 45 | 51 | 4 | LSIL | 6 | 2 | 4 | 2 | 4 | 2 | 2 |
| 46 | 24 | 1 | LSIL | 6 | 2 | 4 | 2 | 6 | 2 | 2 |
| 47 | 35 | 2 | HSIL | 0 | 1 | 0 | 1 | 5 | 1 | 2 |
| 48 | 47 | 3 | HSIL | 0 | 1 | 5 | 1 | 4 | 2 | 2 |
| 49 | 51 | 4 | HSIL | 0 | 1 | 5 | 2 | 7 | 2 | 2 |
| 50 | 68 | 5 | HSIL | 6 | 2 | 7 | 2 | 2 | 1 | 2 |
| 51 | 55 | 4 | HSIL | 5 | 2 | 5 | 2 | 5 | 2 | 2 |
| 52 | 49 | 3 | HSIL | 5 | 2 | 5 | 2 | 5 | 2 | 2 |
| 53 | 51 | 4 | HSIL | 7 | 2 | 6 | 2 | 2 | 1 | 2 |
| 54 | 43 | 3 | HSIL | 5 | 2 | 6 | 2 | 7 | 2 | 2 |
| 55 | 61 | 5 | HSIL | 6 | 2 | 5 | 2 | 6 | 2 | 2 |
| 56 | 38 | 2 | HSIL | 6 | 2 | 5 | 2 | 6 | 2 | 2 |
| 57 | 47 | 3 | HSIL | 6 | 2 | 6 | 2 | 7 | 2 | 2 |
| 58 | 51 | 4 | HSIL | 6 | 2 | 6 | 2 | 7 | 2 | 2 |
| 59 | 32 | 2 | HSIL | 6 | 2 | 7 | 2 | 6 | 2 | 2 |
| 60 | 51 | 4 | HSIL | 6 | 2 | 7 | 2 | 7 | 2 | 2 |
| 61 | 39 | 2 | HSIL | 7 | 2 | 7 | 2 | 5 | 2 | 2 |
| 62 | 54 | 4 | HSIL | 7 | 2 | 7 | 2 | 7 | 2 | 2 |
| 63 | 34 | 2 | HSIL | 7 | 2 | 7 | 2 | 7 | 2 | 2 |

|    |    |   |      |   |   |   |   |   |   |   |
|----|----|---|------|---|---|---|---|---|---|---|
| 64 | 52 | 4 | HSIL | 7 | 2 | 7 | 2 | 7 | 2 | 2 |
| 65 | 33 | 2 | HSIL | 7 | 2 | 7 | 2 | 7 | 2 | 2 |
| 66 | 47 | 3 | HSIL | 7 | 2 | 7 | 2 | 7 | 2 | 2 |
| 67 | 47 | 3 | HSIL | 7 | 2 | 7 | 2 | 7 | 2 | 2 |
| 68 | 47 | 3 | SCC  | 0 | 1 | 7 | 2 | 7 | 2 | 2 |
| 69 | 82 | 5 | SCC  | 0 | 1 | 7 | 2 | 7 | 2 | 2 |
| 70 | 60 | 4 | SCC  | 7 | 2 | 6 | 2 | 7 | 2 | 2 |
| 71 | 51 | 4 | SCC  | 5 | 2 | 7 | 2 | 7 | 2 | 2 |
| 72 | 58 | 4 | SCC  | 7 | 2 | 7 | 2 | 7 | 2 | 2 |
| 73 | 62 | 5 | SCC  | 7 | 2 | 7 | 2 | 7 | 2 | 2 |
| 74 | 45 | 3 | SCC  | 7 | 2 | 7 | 2 | 7 | 2 | 2 |
| 75 | 55 | 4 | SCC  | 7 | 2 | 7 | 2 | 7 | 2 | 2 |

---

P/N = positive or negative, AS = Allred scored, CTTN = cortactin

**Supplement Table S2.** The expected prediction value from development of mathematical models.

| No. | Age | Age<br>group | Grade  | model 1 | model 2 | model 3 | model 4 | model 5 |
|-----|-----|--------------|--------|---------|---------|---------|---------|---------|
| 1   | 60  | 4            | normal | 1.15    | 0.384   | 0.211   | 1.065   | 0.1     |
| 2   | 49  | 3            | normal | 1.15    | 0.384   | 0.211   | 1.065   | 0.253   |
| 3   | 43  | 3            | normal | 1.15    | 0.384   | 0.211   | 1.065   | 0.253   |
| 4   | 51  | 4            | normal | 1.15    | 0.384   | 0.211   | 1.065   | 0.1     |
| 5   | 48  | 3            | normal | 1.15    | 0.384   | 0.211   | 1.065   | 0.253   |
| 6   | 45  | 3            | normal | 1.15    | 0.384   | 0.211   | 1.065   | 0.253   |
| 7   | 48  | 3            | normal | 1.15    | 0.384   | 0.211   | 1.065   | 0.253   |
| 8   | 43  | 3            | normal | 1.15    | 0.384   | 0.211   | 1.065   | 0.253   |
| 9   | 48  | 3            | normal | 1.15    | 0.384   | 0.211   | 1.065   | 0.253   |
| 10  | 40  | 2            | normal | 1.15    | 0.384   | 0.211   | 1.065   | 0.406   |
| 11  | 55  | 4            | normal | 1.15    | 0.384   | 0.211   | 1.065   | 0.1     |
| 12  | 24  | 1            | normal | 1.15    | 0.384   | 0.211   | 1.065   | 0.559   |
| 13  | 50  | 4            | normal | 1.15    | 0.384   | 0.211   | 1.065   | 0.1     |
| 14  | 42  | 3            | normal | 1.15    | 0.384   | 0.211   | 1.065   | 0.253   |
| 15  | 33  | 2            | normal | 1.15    | 0.384   | 0.211   | 1.065   | 0.406   |
| 16  | 49  | 3            | normal | 1.15    | 0.384   | 0.729   | 0.785   | 0.77    |
| 17  | 43  | 3            | normal | 1.15    | 0.384   | 0.729   | 0.785   | 0.77    |
| 18  | 57  | 4            | normal | 1.15    | 0.384   | 0.729   | 0.785   | 0.617   |
| 19  | 27  | 1            | normal | 1.15    | 0.384   | 0.729   | 0.785   | 1.076   |
| 20  | 38  | 2            | normal | 1.15    | 0.954   | 0.768   | 1.595   | 0.945   |
| 21  | 42  | 3            | normal | 1.15    | 0.954   | 0.768   | 1.595   | 0.792   |
| 22  | 61  | 5            | normal | 1.15    | 0.954   | 0.768   | 1.595   | 0.486   |
| 23  | 50  | 4            | normal | 1.15    | 0.954   | 0.768   | 1.595   | 0.639   |
| 24  | 63  | 5            | normal | 1.15    | 0.954   | 0.768   | 1.595   | 0.486   |
| 25  | 50  | 4            | normal | 1.15    | 0.954   | 0.768   | 1.595   | 0.639   |
| 26  | 52  | 4            | normal | 1.15    | 0.954   | 0.768   | 1.595   | 0.639   |
| 27  | 47  | 3            | normal | 1.15    | 0.954   | 0.768   | 1.595   | 0.792   |
| 28  | 41  | 3            | normal | 2.226   | 1.452   | 1.191   | 2.613   | 1.054   |
| 29  | 33  | 2            | normal | 2.226   | 1.452   | 1.191   | 2.613   | 1.207   |

|    |    |   |        |       |       |       |       |       |
|----|----|---|--------|-------|-------|-------|-------|-------|
| 30 | 42 | 3 | normal | 2.226 | 1.452 | 1.191 | 2.613 | 1.054 |
| 31 | 50 | 4 | normal | 2.226 | 1.452 | 1.191 | 2.613 | 0.901 |
| 32 | 49 | 3 | normal | 1.15  | 0.384 | 1.247 | 0.505 | 1.287 |
| 33 | 42 | 3 | normal | 1.15  | 0.384 | 1.247 | 0.505 | 1.287 |
| 34 | 44 | 3 | normal | 1.15  | 0.954 | 1.286 | 1.315 | 1.309 |
| 35 | 44 | 3 | normal | 2.495 | 1.719 | 1.436 | 3     | 1.441 |
| 36 | 46 | 3 | normal | 2.226 | 2.022 | 1.748 | 3.143 | 1.593 |
| 37 | 48 | 3 | normal | 2.226 | 2.022 | 1.748 | 3.143 | 1.593 |
| 38 | 54 | 4 | normal | 1.15  | 0.954 | 1.804 | 1.035 | 1.673 |
| 39 | 43 | 3 | normal | 1.15  | 0.954 | 1.804 | 1.035 | 1.826 |
| 40 | 54 | 4 | normal | 1.15  | 0.954 | 1.804 | 1.035 | 1.673 |
| 41 | 51 | 4 | normal | 1.957 | 1.185 | 1.982 | 1.666 | 2.295 |
| 42 | 36 | 2 | normal | 1.957 | 1.185 | 1.982 | 1.666 | 2.601 |
| 43 | 55 | 4 | normal | 2.495 | 2.289 | 1.993 | 3.53  | 1.827 |
| 44 | 63 | 5 | normal | 2.495 | 2.289 | 1.993 | 3.53  | 1.674 |
| 45 | 49 | 3 | normal | 2.495 | 2.289 | 1.993 | 3.53  | 1.98  |
| 46 | 46 | 3 | normal | 2.495 | 2.289 | 1.993 | 3.53  | 1.98  |
| 47 | 36 | 2 | normal | 2.226 | 1.452 | 2.227 | 2.053 | 2.241 |
| 48 | 43 | 3 | normal | 2.226 | 1.452 | 2.227 | 2.053 | 2.088 |
| 49 | 52 | 4 | normal | 2.764 | 2.556 | 2.238 | 3.917 | 2.214 |
| 50 | 57 | 4 | normal | 2.495 | 1.719 | 2.472 | 2.44  | 2.322 |
| 51 | 51 | 4 | normal | 2.226 | 2.022 | 2.784 | 2.583 | 2.474 |
| 52 | 38 | 2 | normal | 2.226 | 2.022 | 2.784 | 2.583 | 2.78  |
| 53 | 42 | 3 | normal | 2.226 | 2.022 | 2.784 | 2.583 | 2.627 |
| 54 | 35 | 2 | normal | 2.226 | 2.022 | 2.784 | 2.583 | 2.78  |
| 55 | 46 | 3 | normal | 2.495 | 2.289 | 3.029 | 2.97  | 3.014 |
| 56 | 39 | 2 | LSIL   | 1.15  | 0.954 | 0.768 | 1.595 | 0.945 |
| 57 | 37 | 2 | LSIL   | 1.15  | 0.954 | 0.768 | 1.595 | 0.945 |
| 58 | 48 | 3 | LSIL   | 1.15  | 0.384 | 1.247 | 0.505 | 1.287 |
| 59 | 47 | 3 | LSIL   | 1.15  | 0.384 | 1.247 | 0.505 | 1.287 |
| 60 | 20 | 1 | LSIL   | 1.15  | 0.384 | 1.247 | 0.505 | 1.593 |
| 61 | 42 | 3 | LSIL   | 1.957 | 1.755 | 1.503 | 2.756 | 1.953 |
| 62 | 35 | 2 | LSIL   | 1.544 | 0.954 | 1.59  | 1.599 | 1.74  |
| 63 | 46 | 3 | LSIL   | 2.226 | 2.022 | 1.748 | 3.143 | 1.593 |

|    |    |   |      |       |       |       |       |       |
|----|----|---|------|-------|-------|-------|-------|-------|
| 64 | 49 | 3 | LSIL | 1.15  | 0.954 | 1.804 | 1.035 | 1.826 |
| 65 | 51 | 4 | LSIL | 1.15  | 0.954 | 0.768 | 1.595 | 0.639 |
| 66 | 50 | 4 | LSIL | 1.15  | 0.954 | 1.804 | 1.035 | 1.673 |
| 67 | 61 | 5 | LSIL | 1.15  | 0.954 | 1.804 | 1.035 | 1.52  |
| 68 | 21 | 1 | LSIL | 1.15  | 0.954 | 1.804 | 1.035 | 2.132 |
| 69 | 48 | 3 | LSIL | 1.15  | 0.954 | 1.804 | 1.035 | 1.826 |
| 70 | 34 | 2 | LSIL | 1.15  | 0.954 | 1.804 | 1.035 | 1.979 |
| 71 | 36 | 2 | LSIL | 2.135 | 0.954 | 2.046 | 2.025 | 2.157 |
| 72 | 32 | 2 | LSIL | 1.544 | 0.954 | 2.108 | 1.319 | 2.257 |
| 73 | 54 | 4 | LSIL | 1.544 | 0.954 | 2.108 | 1.319 | 1.951 |
| 74 | 51 | 4 | LSIL | 1.544 | 0.954 | 2.108 | 1.319 | 1.951 |
| 75 | 34 | 2 | LSIL | 2.495 | 2.289 | 2.511 | 3.25  | 2.65  |
| 76 | 57 | 4 | LSIL | 2.135 | 0.954 | 2.564 | 1.745 | 2.368 |
| 77 | 84 | 5 | LSIL | 2.135 | 0.954 | 2.564 | 1.745 | 2.215 |
| 78 | 29 | 1 | LSIL | 2.226 | 2.022 | 2.784 | 2.583 | 2.933 |
| 79 | 23 | 1 | LSIL | 2.226 | 2.022 | 2.784 | 2.583 | 2.933 |
| 80 | 54 | 4 | LSIL | 2.495 | 2.289 | 3.029 | 2.97  | 2.861 |
| 81 | 24 | 1 | LSIL | 3.48  | 2.289 | 3.271 | 3.96  | 3.498 |
| 82 | 43 | 3 | LSIL | 3.014 | 2.022 | 3.392 | 3.151 | 3.183 |
| 83 | 39 | 2 | LSIL | 3.211 | 2.194 | 3.544 | 3.293 | 3.475 |
| 84 | 47 | 3 | LSIL | 3.48  | 2.289 | 3.789 | 3.68  | 3.709 |
| 85 | 51 | 4 | LSIL | 3.552 | 2.728 | 3.882 | 3.925 | 3.804 |
| 86 | 24 | 1 | LSIL | 3.552 | 2.728 | 3.882 | 3.925 | 4.263 |
| 87 | 54 | 4 | HSIL | 1.15  | 0.954 | 0.768 | 1.595 | 0.639 |
| 88 | 52 | 4 | HSIL | 1.15  | 0.954 | 0.768 | 1.595 | 0.639 |
| 89 | 35 | 2 | HSIL | 1.15  | 0.384 | 1.247 | 0.505 | 1.44  |
| 90 | 68 | 5 | HSIL | 1.957 | 1.755 | 1.503 | 2.756 | 1.647 |
| 91 | 66 | 5 | HSIL | 2.495 | 2.289 | 1.993 | 3.53  | 1.674 |
| 92 | 34 | 2 | HSIL | 2.495 | 2.289 | 1.993 | 3.53  | 2.133 |
| 93 | 56 | 4 | HSIL | 2.495 | 2.289 | 1.993 | 3.53  | 1.827 |
| 94 | 26 | 1 | HSIL | 3.408 | 1.624 | 2.103 | 3.465 | 2.194 |
| 95 | 44 | 3 | HSIL | 2.764 | 2.556 | 2.238 | 3.917 | 2.367 |
| 96 | 47 | 3 | HSIL | 2.135 | 0.954 | 2.564 | 1.745 | 2.521 |
| 97 | 51 | 4 | HSIL | 2.135 | 1.126 | 2.564 | 1.745 | 2.368 |

|     |    |   |      |       |       |       |       |       |
|-----|----|---|------|-------|-------|-------|-------|-------|
| 98  | 31 | 2 | HSIL | 4.412 | 2.425 | 2.99  | 4.768 | 3.341 |
| 99  | 33 | 2 | HSIL | 4.412 | 2.425 | 2.99  | 4.768 | 3.341 |
| 100 | 38 | 2 | HSIL | 4.143 | 2.728 | 3.302 | 4.911 | 3.493 |
| 101 | 28 | 1 | HSIL | 4.412 | 2.995 | 3.547 | 5.298 | 4.033 |
| 102 | 39 | 2 | HSIL | 4.412 | 2.995 | 3.547 | 5.298 | 3.88  |
| 103 | 68 | 5 | HSIL | 4.143 | 2.158 | 3.781 | 3.821 | 3.529 |
| 104 | 55 | 4 | HSIL | 3.48  | 2.461 | 3.789 | 3.68  | 3.556 |
| 105 | 49 | 3 | HSIL | 3.48  | 2.461 | 3.789 | 3.68  | 3.709 |
| 106 | 51 | 4 | HSIL | 4.215 | 2.425 | 3.874 | 4.066 | 3.93  |
| 107 | 43 | 3 | HSIL | 3.677 | 2.461 | 3.941 | 3.822 | 3.848 |
| 108 | 61 | 5 | HSIL | 3.749 | 2.728 | 4.034 | 4.067 | 3.79  |
| 109 | 38 | 2 | HSIL | 3.749 | 2.728 | 4.034 | 4.067 | 4.249 |
| 110 | 47 | 3 | HSIL | 3.946 | 2.728 | 4.186 | 4.209 | 4.235 |
| 111 | 51 | 4 | HSIL | 3.946 | 2.728 | 4.186 | 4.209 | 4.082 |
| 112 | 32 | 2 | HSIL | 4.143 | 2.728 | 4.338 | 4.351 | 4.527 |
| 113 | 51 | 4 | HSIL | 4.143 | 2.728 | 4.338 | 4.351 | 4.221 |
| 114 | 39 | 2 | HSIL | 4.412 | 2.995 | 4.583 | 4.738 | 4.914 |
| 115 | 54 | 4 | HSIL | 4.412 | 2.995 | 4.583 | 4.738 | 4.608 |
| 116 | 34 | 2 | HSIL | 4.412 | 2.995 | 4.583 | 4.738 | 4.914 |
| 117 | 52 | 4 | HSIL | 4.412 | 2.995 | 4.583 | 4.738 | 4.608 |
| 118 | 33 | 2 | HSIL | 4.412 | 2.995 | 4.583 | 4.738 | 4.914 |
| 119 | 47 | 3 | HSIL | 4.412 | 2.995 | 4.583 | 4.738 | 4.761 |
| 120 | 47 | 3 | HSIL | 4.412 | 2.995 | 4.583 | 4.738 | 4.761 |
| 121 | 47 | 3 | SCC  | 2.529 | 1.126 | 2.868 | 2.029 | 2.799 |
| 122 | 82 | 5 | SCC  | 2.529 | 1.126 | 2.868 | 2.029 | 2.493 |
| 123 | 34 | 2 | SCC  | 4.412 | 2.995 | 3.547 | 5.298 | 3.88  |
| 124 | 60 | 4 | SCC  | 4.412 | 2.995 | 3.547 | 5.298 | 3.574 |
| 125 | 60 | 4 | SCC  | 4.215 | 2.995 | 4.431 | 4.596 | 4.469 |
| 126 | 51 | 4 | SCC  | 3.874 | 2.461 | 4.093 | 3.964 | 3.834 |
| 127 | 58 | 4 | SCC  | 4.412 | 2.995 | 4.583 | 4.738 | 4.608 |
| 128 | 62 | 5 | SCC  | 4.412 | 2.995 | 4.583 | 4.738 | 4.455 |
| 129 | 45 | 3 | SCC  | 4.412 | 2.995 | 4.583 | 4.738 | 4.761 |
| 130 | 55 | 4 | SCC  | 4.412 | 2.995 | 4.583 | 4.738 | 4.608 |

---

**Supplement Table S3.** Sensitivity, specificity, PPV and NPV of pathological grades analyzed by models 1 to 5 in the test sample set.

| Tested sample set                                        |             |             |     |     |        |
|----------------------------------------------------------|-------------|-------------|-----|-----|--------|
| LSIL group (Normal+LSIL) <i>vs</i> HSIL group (HSIL+SCC) |             |             |     |     |        |
|                                                          | Sensitivity | Specificity | PPV | NPV | OR     |
| Model 1                                                  | 86          | 93          | 73  | 97  | 77.52  |
| Model 2                                                  | 91          | 90          | 67  | 98  | 87.75  |
| Model 3                                                  | 91          | 96          | 85  | 98  | 254.89 |
| Model 4                                                  | 93          | 91          | 69  | 98  | 127.40 |
| Model 5                                                  | 91          | 96          | 83  | 98  | 221.81 |

PPV = Positive predictive value, NPV = Negative predictive value, OR = odds ratio

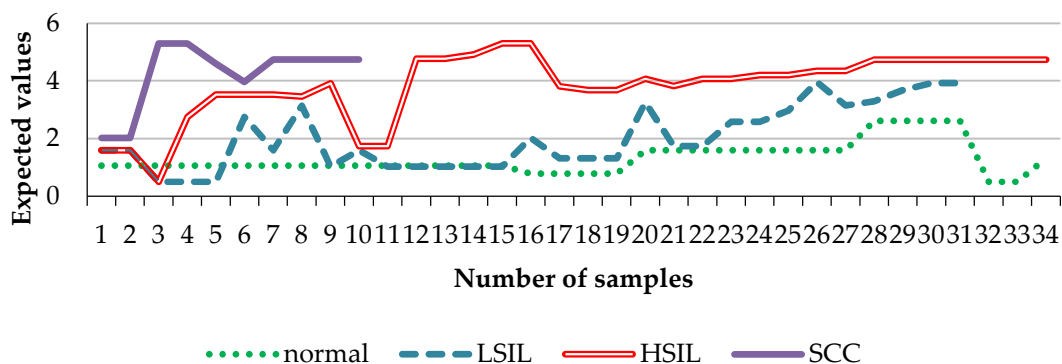

**Supplement Figure S1.** Means of the expected values from the linear regression models and clinical pathological grades (each sample) of confirmed sample sets.



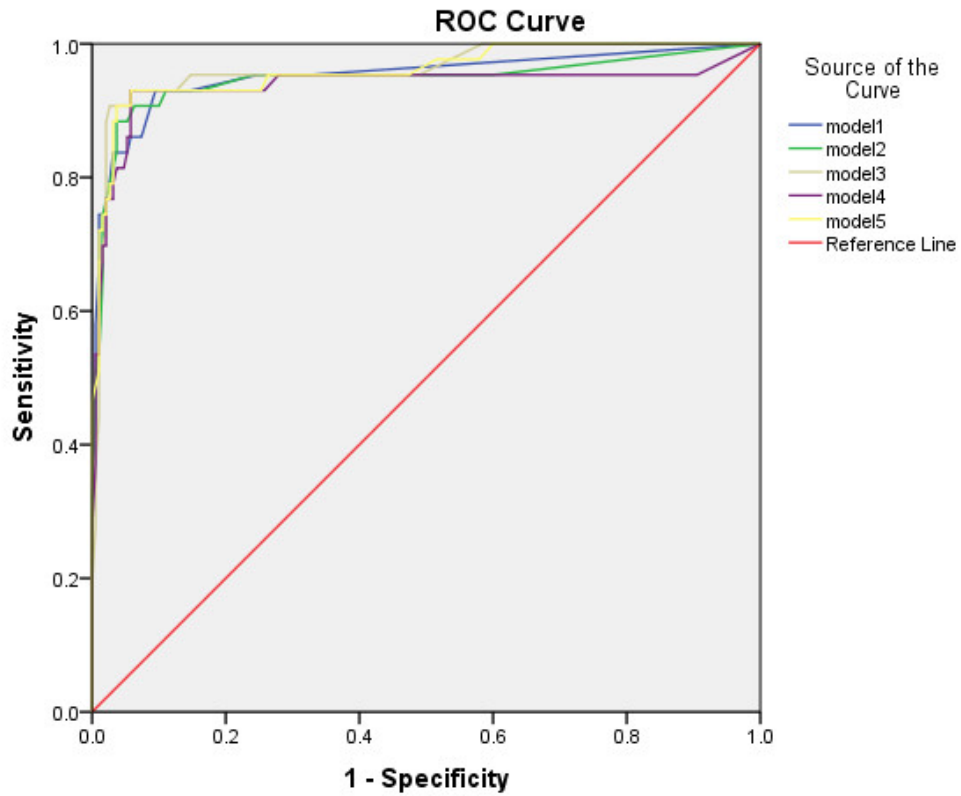

Diagonal segments are produced by ties.

**Supplement Figure S2.** ROC curves and AUCs when comparing sensitivity and specificity of models 1 to 5 between normal+LSIL and HSIL+SCC in the test sample set. AUCs of models 1 to 5 were 0.953, 0.946, 0.962, 0.937 and 0.960, respectively ( $P=0.000$ ).

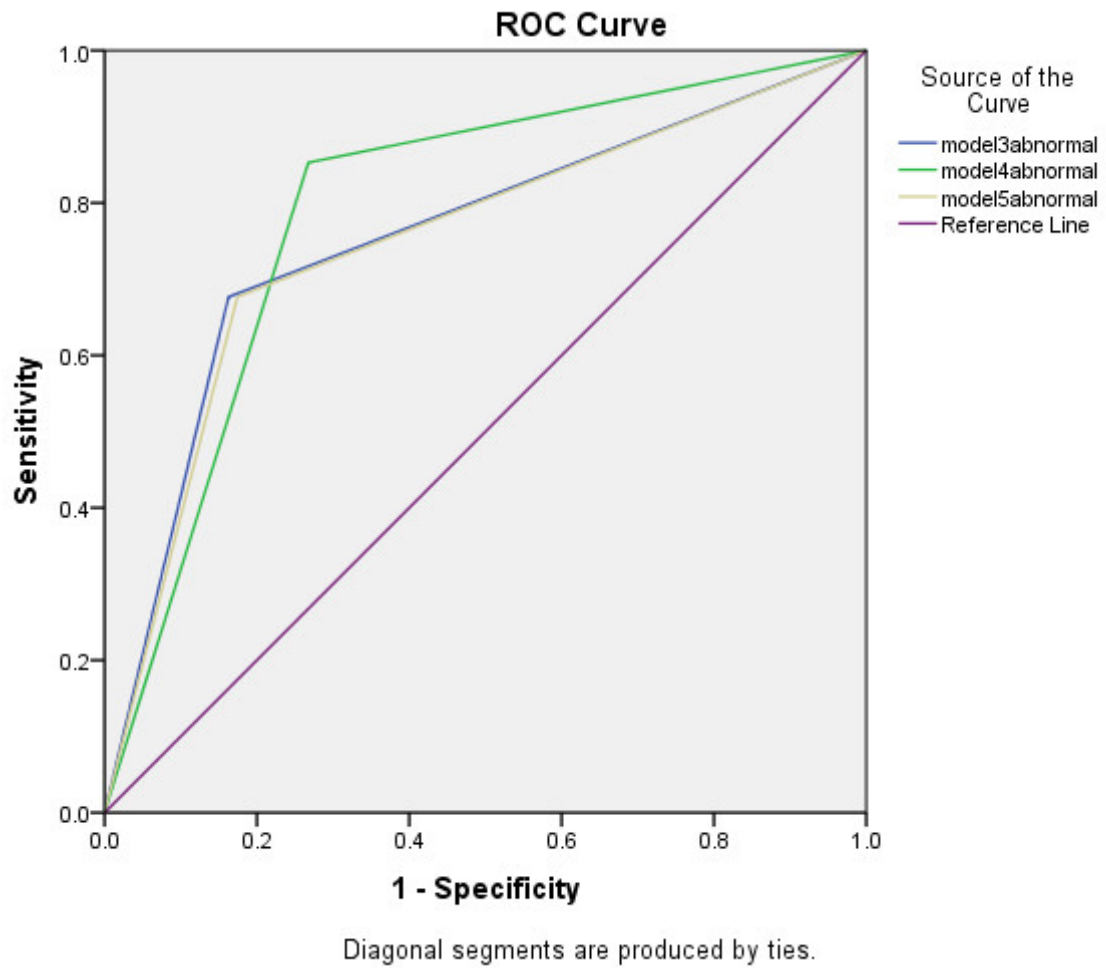

**Supplement Figure S3.** ROC curves and AUC when comparing sensitivity and specificity of models 3 to 5 between normal and LSIL+HSIL in a confirmed sample set. AUCs of these models were 0.757, 0.793, and 0.751, respectively ( $P=0.000$ ) to predict risk biomolecules.

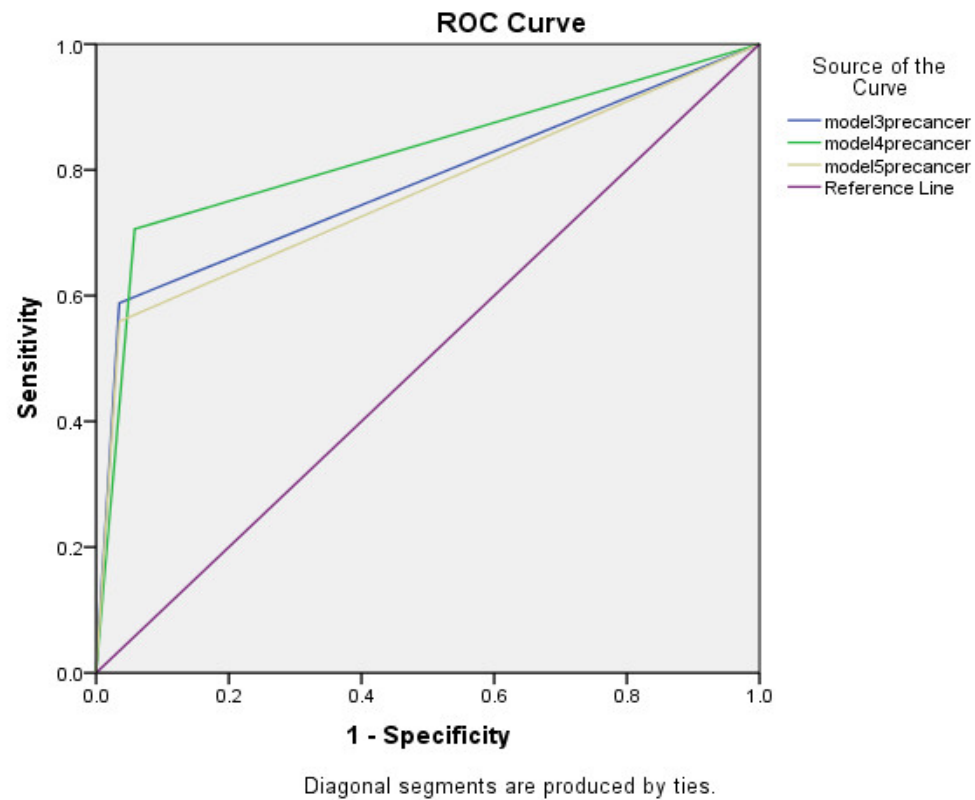

**Supplement Figure S4.** ROC curves and AUCs when comparing sensitivity and specificity of models 3 to 5 between normal+LSIL and HSIL in a confirmed sample set. AUCs of these model were 0.777, 0.824 and 0.762, respectively ( $P=0.000$ ) to predict precancerous lesions.
